# Supplementary material for: The Pleiotropic CymR Regulator of Staphylococcus aureus Plays an Important Role in Virulence and Stress Response
Source: PubMed Central journal article supplement (PMC2869319; doi:10.1371/journal.ppat.1000894), 2010-05-13
Supplement: ppat.1000894.s003.pdf [file ppat.1000894.s003.pdf]

**Table S1.** Additional stress-regulated genes differentially expressed in the *S. aureus*  $\Delta cymR$  mutant strain compared with strain SH1000

| Gene name <sup>a</sup><br>(synonym) | Function/similarity                                                                   | Transcriptome analysis <sup>b</sup>              |          | Differential expression under stress conditions <sup>c</sup> |
|-------------------------------------|---------------------------------------------------------------------------------------|--------------------------------------------------|----------|--------------------------------------------------------------|
|                                     |                                                                                       | $\Delta cymR$ /<br>SH1000<br>expression<br>ratio | P value  |                                                              |
| SA1315                              | ferredoxin, putative                                                                  | 5.38                                             | 0.0129   | Nitrite                                                      |
| SA1316                              | conserved hypothetical protein                                                        | 2.09                                             | <1.0E-16 | H <sub>2</sub> O <sub>2</sub> , nitrite                      |
| SA0938                              | cytochrome d ubiquinol oxidase, subunit II                                            | 2.40                                             | <1.0E-16 | H <sub>2</sub> O <sub>2</sub> , nitrosative, nitrite         |
| SA0937                              | cytochrome d ubiquinol oxidase, subunit I                                             | 2.36                                             | <1.0E-16 | H <sub>2</sub> O <sub>2</sub> , nitrosative, nitrite         |
| SA1175                              | hypothetical protein                                                                  | 2.25                                             | <1.0E-16 | H <sub>2</sub> O <sub>2</sub>                                |
| SA0509                              | conserved hypothetical protein                                                        | 2.19                                             | <1.0E-16 | General (sigma B), nitrite                                   |
| SA1589 <i>ribD</i>                  | riboflavin biosynthesis RibD<br>hydrolase, haloacid dehalogenase-like<br>family       | 2.01                                             | 0.0129   | H <sub>2</sub> O <sub>2</sub><br>Nitrite                     |
| SA0517                              | transglycosylase domain protein                                                       | 1.91                                             | 2.22E-16 | Nitrite                                                      |
| SA1691                              | FMN oxidoreductase                                                                    | 1.83                                             | 1.18E-12 | H <sub>2</sub> O <sub>2</sub> , nitrite                      |
| SA0817                              | conserved hypothetical protein                                                        | 1.76                                             | 7.92E-06 | H <sub>2</sub> O <sub>2</sub>                                |
| SA0800                              | M23/M37 peptidase domain protein                                                      | 1.72                                             | 1.00E-07 | H <sub>2</sub> O <sub>2</sub> , nitrite                      |
| SA0205                              | riboflavin synthase, alpha subunit                                                    | 1.67                                             | 3.81E-09 | H <sub>2</sub> O <sub>2</sub>                                |
| SA1588 <i>ribE</i>                  | alcohol dehydrogenase, zinc-containing                                                | 1.64                                             | 0.0129   | Nitrite                                                      |
| SA1989*                             | putative DNA binding protein                                                          | 1.64                                             | 1.71E-06 | Nitrite                                                      |
| SA1235                              | conserved hypothetical protein                                                        | 1.63                                             | 1.54E-08 | Nitrite                                                      |
| SA2328                              | LexA repressor                                                                        | 1.60                                             | 0.00018  | General (sigma B), H <sub>2</sub> O <sub>2</sub>             |
| SA1174 <i>lexA</i>                  | ABC transporter, ATP-binding protein                                                  | 1.57                                             | 1.70E-07 | H <sub>2</sub> O <sub>2</sub><br>General (sigma B)           |
| SA0774                              | exonuclease                                                                           | 1.54                                             | 6.46E-07 | H <sub>2</sub> O <sub>2</sub> , nitrosative, nitrite         |
| SA1710                              | conserved hypothetical protein<br>membrane protein, putative, authentic<br>frameshift | 1.52                                             | 1.30E-06 | Nitrite                                                      |
| SA0526                              | negative regulator of competence                                                      | 1.51                                             | 8.32E-05 | H <sub>2</sub> O <sub>2</sub>                                |
| SA2328                              | N-acetyltransferase family protein                                                    | 1.50                                             | 3.33E-09 | Nitrite                                                      |
| SA0857 <i>mecA</i> *                | glutamine synthetase repressor                                                        | 1.50                                             | 3.37E-06 | H <sub>2</sub> O <sub>2</sub> , nitrite                      |
| SA2490                              | conserved hypothetical protein                                                        | 1.49                                             | 4.29E-06 | Nitrite                                                      |
| SA1149 <i>glnR</i>                  | TIGR00294                                                                             | 1.49                                             | 0.05     | H <sub>2</sub> O <sub>2</sub> , nitrosative<br>Nitrite       |
| SA0524                              | site-specific recombinase XerD                                                        | 1.47                                             | 7.29E-07 | Nitrite                                                      |
| SA1328 <i>xerD</i> *                | FemC protein, glutamine synthetase                                                    | 1.46                                             | 1.07E-05 | H <sub>2</sub> O <sub>2</sub> , nitrosative                  |
| SA1150 <i>glnA</i> *                | RecA protein                                                                          | 1.45                                             | 0.0129   | H <sub>2</sub> O <sub>2</sub> , nitrite                      |
| SA1128*                             | drug resistance transporter, EmrB/QacA<br>subfamily                                   | 1.44                                             | 2.23E-05 | H <sub>2</sub> O <sub>2</sub> , nitrite                      |
| SA2142*                             | conserved hypothetical protein                                                        | 1.40                                             | 0.001    | H <sub>2</sub> O <sub>2</sub> , nitrite                      |
| SA0412                              | conserved hypothetical protein                                                        | 1.35                                             | 6.14E-07 | H <sub>2</sub> O <sub>2</sub>                                |
| SA2322                              | conserved hypothetical protein                                                        | 0.71                                             | 0.00013  | H <sub>2</sub> O <sub>2</sub>                                |
| SA0747 <i>cspC</i>                  | cold-shock protein CspC                                                               | 0.71                                             | 0.0089   | Nitrite                                                      |
| SA1548                              | 1-acyl-sn-glycerol-3-phosphate<br>acyltransferase, putative                           | 0.71                                             | 0.0032   | H <sub>2</sub> O <sub>2</sub>                                |
| SA2485*                             | hypothetical protein                                                                  | 0.70                                             | 8.92E-05 | General (sigma B)                                            |
| SA1140 <i>glpF</i> *                | glycerol uptake facilitator protein                                                   | 0.70                                             | 8.78E-05 | H <sub>2</sub> O <sub>2</sub>                                |
| SA2197                              | conserved hypothetical protein                                                        | 0.68                                             | 2.46E-06 | H <sub>2</sub> O <sub>2</sub>                                |
| SA0873*                             | conserved hypothetical protein                                                        | 0.67                                             | 6.85E-06 | Nitrite                                                      |

|                      |                                                              |      |          |                                                  |
|----------------------|--------------------------------------------------------------|------|----------|--------------------------------------------------|
| SA2374               | conserved hypothetical protein                               | 0.66 | 5.02E-06 | General (sigma B), H <sub>2</sub> O <sub>2</sub> |
| SA1547*              | PTS system, N-acetylglucosamine-specific component           | 0.65 | 6.25E-06 | H <sub>2</sub> O <sub>2</sub> , nitrite          |
| SA0617*              | transporter, putative                                        | 0.63 | 0.01     | H <sub>2</sub> O <sub>2</sub>                    |
| SA0479               |                                                              | 0.61 | 4.29E-08 | H <sub>2</sub> O <sub>2</sub>                    |
| SA0360*              | conserved hypothetical protein                               | 0.60 | 9.96E-06 | General (sigma B), H <sub>2</sub> O <sub>2</sub> |
| SA0341*              | hypothetical protein                                         | 0.60 | 0.00018  | H <sub>2</sub> O <sub>2</sub> , nitrite          |
| SA2098               | D-isomer specific 2-hydroxyacid dehydrogenase family protein | 0.57 | 4.22E-10 | Nitrite                                          |
| SA0359               | conserved hypothetical protein                               | 0.57 | 0.005    | H <sub>2</sub> O <sub>2</sub> , nitrite          |
| SA2102*              | formate dehydrogenase, alpha subunit, putative               | 0.55 | 4.26E-11 | General (sigma B)                                |
| SA0996 <i>sdhB</i> * | succinate dehydrogenase, iron-sulfur protein                 | 0.53 | 4.41E-09 | Nitrosative, nitrite                             |
| SA0995 <i>sdhA</i> * | succinate dehydrogenase, flavoprotein subunit                | 0.51 | 3.46E-14 | Nitrosative, nitrite                             |
| SA0682*              | proton-dependent oligopeptide transporter family protein     | 0.51 | 1.23E-13 | H <sub>2</sub> O <sub>2</sub>                    |
| SA0131 <i>deoD</i> * | purine nucleoside phosphorylase                              | 0.29 | 0.0052   | H <sub>2</sub> O <sub>2</sub>                    |

a. The SA numbers (N315 strain) for *S. aureus* genes correspond to those of AureoList (<http://genolist.pasteur.fr/AureoList/>).

“\*” indicates genes differentially expressed upon internalization of *S. aureus* in human epithelial cells [1].

b. The results obtained are representative of 8 hybridizations from 4 independent cultures in TSB medium with 2 mM cystine. The data sets generated were loaded into the GenoScript Database (<http://genoscript.pasteur.fr>)[2].

c. Differential expression of corresponding genes under indicated stress conditions including hydrogen peroxide (H<sub>2</sub>O<sub>2</sub>) [3], nitrite [4], nitrosative [5] and general (sigma B) [6] stresses.

#### References:

1. Garzoni C, Francois P, Huyghe A, Couzinet S, Tapparel C, et al. (2007) A global view of *Staphylococcus aureus* whole genome expression upon internalization in human epithelial cells. BMC Genomics 8: 171.
2. Soutourina O, Poupel O, Coppee JY, Danchin A, Msadek T, et al. (2009) CymR, the master regulator of cysteine metabolism in *Staphylococcus aureus*, controls host sulfur source utilization and plays a role in biofilm formation. Mol Microbiol 73: 194-211.
3. Chang W, Small DA, Toghrol F, Bentley WE (2006) Global transcriptome analysis of *Staphylococcus aureus* response to hydrogen peroxide. J Bacteriol 188: 1648-1659.
4. Schlag S, Nerz C, Birkenstock TA, Altenberend F, Gotz F (2007) Inhibition of staphylococcal biofilm formation by nitrite. J Bacteriol 189: 7911-7919.
5. Richardson AR, Dunman PM, Fang FC (2006) The nitrosative stress response of *Staphylococcus aureus* is required for resistance to innate immunity. Mol Microbiol 61: 927-939.
6. Bischoff M, Dunman P, Kormanec J, Macapagal D, Murphy E, et al. (2004) Microarray-based analysis of the *Staphylococcus aureus* sigmaB regulon. J Bacteriol 186: 4085-4099.
