# Supplementary material for: The Pleiotropic CymR Regulator of Staphylococcus aureus Plays an Important Role in Virulence and Stress Response
Source: PubMed Central journal article supplement (PMC2869319; doi:10.1371/journal.ppat.1000894), 2010-05-13
Supplement: ppat.1000894.s004.pdf [file ppat.1000894.s004.pdf]

**Table S2.** Relative expression levels of stress response-associated genes in *S. aureus* mutant strains compared to SH1000.

| Gene name   | H <sub>2</sub> O <sub>2</sub> /stressless conditions expression ratio |             | <i>cymR</i> mutant/SH1000 expression ratio |              |                 |                |                    |              |                |
|-------------|-----------------------------------------------------------------------|-------------|--------------------------------------------|--------------|-----------------|----------------|--------------------|--------------|----------------|
|             | SH1000                                                                | <i>cymR</i> | <i>cymR</i>                                | <i>perR</i>  | <i>cymRperR</i> | <i>perRfur</i> | <i>cymRperRfur</i> | <i>fur</i>   | <i>cymRfur</i> |
| <i>ahpF</i> | 7.8                                                                   | 0.97        | <b>12.01</b>                               | <b>28.03</b> | <b>15.06</b>    | <b>26.87</b>   | <b>6.62</b>        | <b>17.41</b> | <b>13.15</b>   |
| <i>dps</i>  | <b>22.8</b>                                                           | <b>9.29</b> | <b>4.40</b>                                | <b>82.71</b> | <b>13.14</b>    | <b>92.52</b>   | <b>4.85</b>        | <b>2.67</b>  | <b>6.89</b>    |
| <i>sodA</i> | 0.98                                                                  | 0.54        | <b>5.05</b>                                | 1.08         | <b>5.89</b>     | 1.36           | <b>3.64</b>        | 1.44         | <b>5.05</b>    |
| <i>sodM</i> | 0.59                                                                  | 0.81        | <b>2.86</b>                                | 1.15         | <b>3.53</b>     | 1.78           | <b>2.08</b>        | 1.74         | <b>4.44</b>    |
| <i>copA</i> | 0.72                                                                  | 0.86        | <b>11.83</b>                               | 1.09         | <b>26.14</b>    | 0.97           | <b>10.29</b>       | 1.26         | <b>13.11</b>   |

For qRT-PCR analysis, total RNA was extracted from *S. aureus* strains grown in TSB medium supplemented with 2 mM cystine. For H<sub>2</sub>O<sub>2</sub> stress induction the bacteria were incubated with 20 mM H<sub>2</sub>O<sub>2</sub> for 10 minutes. After reverse transcription, specific cDNAs were quantified by qRT-PCR using 16S rRNA gene for normalization. In bold are indicated the expression ratios > 2 of regulated genes.
