# Supplementary material for: The Pleiotropic CymR Regulator of Staphylococcus aureus Plays an Important Role in Virulence and Stress Response
Source: PubMed Central journal article supplement (PMC2869319; doi:10.1371/journal.ppat.1000894), 2010-05-13
Supplement: ppat.1000894.s005.pdf [file ppat.1000894.s005.pdf]

**Table S3.** Intracellular metabolite estimation in *S. aureus cymR* mutant strain compared to SH1000.

| <b>Metabolite</b> | <b>Strain</b> | <b>SH1000</b> | <b>SA17 <i>cymR</i></b> | <b><i>cymR</i>/SH1000 ratio</b> |
|-------------------|---------------|---------------|-------------------------|---------------------------------|
| Aspartate         |               | 4785          | 6298                    | 1.3                             |
| Glutamate         |               | 6587          | 1617                    | 0.25                            |
| Cysteine          |               | 18.5          | 1270                    | 68                              |
| Proline           |               | 1674          | 1900                    | 1.1                             |
| Glycine           |               | 337           | 253.5                   | 0.75                            |
| Alanine           |               | 935           | 968                     | 1                               |
| Valine            |               | 341           | 268                     | 0.8                             |
| Cystine           |               | 37            | 71                      | 1.9                             |
| Homocysteine      |               | 15.5          | 91                      | 5.8                             |
| Methionine        |               | 32            | 52                      | 1.60                            |
| Cystathionine     |               | 15.5          | 29                      | 1.85                            |
| Isoleucine        |               | 182           | 149                     | 0.8                             |
| Leucine           |               | 809           | 673                     | 0.8                             |
| Tyrosine          |               | 45            | 57                      | 1.3                             |
| Phenylalanine     |               | 200           | 177                     | 0.9                             |
| NH <sub>3</sub>   |               | 373           | 384                     | 1                               |
| Lysine            |               | 277           | 279                     | 1                               |
| Histidine         |               | 31            | 36                      | 1.1                             |

Intracellular metabolite concentrations given in  $\mu\text{M}$  are mean values of at least 4 independent experiments with *S. aureus* strains grown in TSB medium supplemented with 2 mM cystine. Standard deviations were less than 15% of the mean.
