# Supplementary material for: The Pleiotropic CymR Regulator of Staphylococcus aureus Plays an Important Role in Virulence and Stress Response
Source: PubMed Central journal article supplement (PMC2869319; doi:10.1371/journal.ppat.1000894), 2010-05-13
Supplement: ppat.1000894.s006.pdf [file ppat.1000894.s006.pdf]

**Table S4.** Virulence or host-interaction associated genes differentially expressed in the *S. aureus*  $\Delta cymR$  mutant strain compared to SH1000

| Gene name <sup>a</sup><br>(synonym) | Function/similarity                                                    | Transcriptome analysis <sup>b</sup>              |                | qRT-PCR <sup>c</sup>                             | Differential expression in strains mutant for virulence regulators <sup>d</sup> |
|-------------------------------------|------------------------------------------------------------------------|--------------------------------------------------|----------------|--------------------------------------------------|---------------------------------------------------------------------------------|
|                                     |                                                                        | $\Delta cymR$ /<br>SH1000<br>expression<br>ratio | <i>P</i> value | $\Delta cymR$ /<br>SH1000<br>expression<br>ratio |                                                                                 |
| SA0363*                             | conserved hypothetical protein                                         | 0.18                                             | 0.00025        |                                                  | SarA                                                                            |
| SA2353*                             | ssaA homolog                                                           | 0.47                                             | <1.0E-16       | 0.44                                             | WalKR                                                                           |
| SA0271                              | conserved hypothetical protein                                         | 0.50                                             | 1.71E-09       |                                                  | SarA, Rot, AgrA                                                                 |
| SA1898                              | SceD protein, putative                                                 | 0.51                                             | 2.97E-13       | 0.41                                             | WalKR                                                                           |
| SA0650                              | drug transporter                                                       | 0.51                                             | 1.04E-13       |                                                  | MgrA                                                                            |
| SA2343                              | hypothetical protein                                                   | 0.51                                             | 1.87E-12       |                                                  | AgrA, SarA, MgrA                                                                |
| SA0675                              | ABC transporter, ATP-binding protein                                   | 0.51                                             | 0.025          |                                                  | Rot                                                                             |
| SA2378*                             | glyoxalase family protein                                              | 0.54                                             | 1.01E-11       | 0.48                                             | AgrA, SarA, MgrA, Rot                                                           |
| SA2082 <i>ureA</i>                  | urease, gamma subunit                                                  | 0.54                                             | 1.03E-11       |                                                  | Rot, ArlR, MgrA                                                                 |
| SA1747*                             | ABC transporter, ATP-binding protein                                   | 0.55                                             | 1.42E-06       |                                                  | SarA                                                                            |
| SA2239                              | amino acid permease                                                    | 0.57                                             | 5.50E-09       |                                                  | AgrA, MgrA                                                                      |
| SA0443                              | conserved hypothetical protein                                         | 0.58                                             | 1.89E-09       |                                                  | MgrA                                                                            |
| SA0432*                             | PTS system component                                                   | 0.58                                             | 2.65E-09       |                                                  | AgrA                                                                            |
| SA1965 <i>femD</i> *                | phosphoglucosamine mutase                                              | 0.60                                             | 8.24E-09       |                                                  |                                                                                 |
| SA0672*                             | conserved hypothetical protein<br>TIGR00370                            | 0.60                                             | 9.69E-08       |                                                  | SarA, SaeSR                                                                     |
| SA0244 <i>tagF</i>                  | teichoic acid biosynthesis protein F                                   | 0.63                                             | 3.09E-07       | 0.52                                             | SarA                                                                            |
| SA0523                              | glycosyl transferase, group 1                                          | 0.64                                             | 1.45E-06       |                                                  | SarA, Rot                                                                       |
| SA0423                              | LysM domain protein                                                    | 0.64                                             | 0.033          |                                                  | SarA                                                                            |
| SA1985*                             | hypothetical protein                                                   | 0.64                                             | 0.0019         |                                                  | SarA                                                                            |
| SA0796 <i>dltD</i> *                | extramembranal protein                                                 | 0.65                                             | 1.08E-08       | 0.47                                             |                                                                                 |
| SA2261                              | transporter, putative                                                  | 0.65                                             | 2.58E-06       |                                                  | Rot                                                                             |
| SA1956*                             | lytic regulatory protein                                               | 0.65                                             | 1.57E-05       |                                                  | MgrA, SarA                                                                      |
| SA2171                              | hypothetical protein                                                   | 0.66                                             | 3.66E-07       |                                                  | Rot                                                                             |
| SA2088 <i>ureD</i> *                | urease accessory protein UreD                                          | 0.66                                             | 3.75E-06       |                                                  | ArlSR, MgrA, Rot                                                                |
| SA2086 <i>ureF</i>                  | urease accessory protein UreF                                          | 0.67                                             | 9.48E-06       |                                                  | ArlSR, MgrA, Rot                                                                |
| SA2084 <i>ureC</i>                  | urease, alpha subunit                                                  | 0.67                                             | 1.05E-05       |                                                  | ArlSR, MgrA, Rot                                                                |
| SA2331                              | hypothetical protein                                                   | 0.67                                             | 1.29E-05       |                                                  | SarA                                                                            |
| SA0905 <i>atl</i> *                 | bifunctional autolysin precursor<br>D-alanine-D-alanyl carrier protein | 0.67                                             | 9.78E-06       |                                                  | WalKR                                                                           |
| SA0793 <i>dltA</i> *                | ligase                                                                 | 0.68                                             | 0.044          | 0.51                                             |                                                                                 |
| SA2441                              | glycosyl transferase, group 1                                          | 0.68                                             | 1.99E-05       |                                                  |                                                                                 |
| SA0794 <i>dltB</i> *                | DltB protein                                                           | 0.69                                             | 0.0028         |                                                  |                                                                                 |
| SA0651*                             | hypothetical protein                                                   | 0.70                                             | 0.00016        |                                                  | Rot                                                                             |
| SA1684*                             | conserved hypothetical protein                                         | 1.41                                             | 5.25E-05       |                                                  | AgrA, SarA                                                                      |
| SA1194 <i>msrA</i>                  | methionine sulfoxide reductase                                         | 1.41                                             | 0.0011         |                                                  | Rot                                                                             |
| SA2007                              | alpha-acetolactate decarboxylase,<br>putative                          | 1.44                                             | 1.28E-05       |                                                  | AgrA, ArlSR, MgrA, Rot                                                          |
| SA2006*                             | Map protein, putative                                                  | 1.54                                             | 6.37E-09       |                                                  | AgrA, SarA, ArlR                                                                |
| SA1041 <i>pyrR</i>                  | pyrimidine operon regulatory protein                                   | 1.56                                             | 0.012          |                                                  | SarA, AgrA, MgrA                                                                |
| SACOL0673                           | hypothetical protein                                                   | 1.62                                             | 2.17E-08       |                                                  | AgrA, SarA                                                                      |

|           |                                                             |      |          |      |                    |
|-----------|-------------------------------------------------------------|------|----------|------|--------------------|
| SACOL1186 | antibacterial protein                                       | 1.64 | <1.0E-16 |      | AgrA, SarA         |
| SA1811    | phospholipase C precursor                                   | 1.69 | 1.35E-05 |      | SaeR               |
| SA1131*   | pyruvate ferredoxin oxidoreductase, alpha subunit, putative | 1.77 | 1.40E-12 |      | Rot                |
| SACOL1187 | antibacterial protein, phenol soluble modulins              | 2.07 | 8.88E-16 | 2.23 | SarA               |
| SA0914    | chitinase-related protein                                   | 2.15 | <1.0E-16 |      | SarA, Rot          |
| SA0395    | conserved hypothetical protein                              | 2.15 | <1.0E-16 |      | SarA, SaeSR        |
| SA1490    | YhjN protein; toxin production and resistance               | 2.21 | <1.0E-16 | 3.77 | SarA               |
| SA0395    | hypothetical protein, pathogen island                       | 2.63 | <1.0E-16 | 5.26 | ArlSR, SarA, SaeSR |
| SAS016*   | hypothetical protein                                        | 3.87 | <1.0E-16 |      | SarA               |

**a.** The gene numbers SACOL and SA correspond to *S. aureus* COL and N315 strain genomic sequence, respectively (<http://cmr.tigr.org/tigr-scripts/CMR/GenomePage.cgi?database=gsa>).

“\*” indicates genes differentially expressed upon internalization of *S. aureus* in human epithelial cells [1].

**b.** The results obtained are representative of 8 hybridizations from 4 independent cultures. The data sets generated were loaded into the GenoScript Database (<http://genoscript.pasteur.fr>)[2].

**c.** For qRT-PCR analysis, total RNA was extracted from *S. aureus* strains grown in TSB medium supplemented with 2 mM cystine.

**d.** Differential expression of corresponding genes in strains deficient for the indicated virulence regulators, including SarA [3-5], AgrA [3,4], ArlSR [6], SaeSR [7], Rot [8], MgrA [9] and WalKR [10].

#### References:

- Garzoni C, Francois P, Huyghe A, Couzinet S, Tapparel C, et al. (2007) A global view of *Staphylococcus aureus* whole genome expression upon internalization in human epithelial cells. *BMC Genomics* 8: 171.
- Soutourina O, Poupel O, Coppee JY, Danchin A, Msadek T, et al. (2009) CymR, the master regulator of cysteine metabolism in *Staphylococcus aureus*, controls host sulfur source utilization and plays a role in biofilm formation. *Mol Microbiol* 73: 194-211.
- Cassat J, Dunman PM, Murphy E, Projan SJ, Beenken KE, et al. (2006) Transcriptional profiling of a *Staphylococcus aureus* clinical isolate and its isogenic *agr* and *sarA* mutants reveals global differences in comparison to the laboratory strain RN6390. *Microbiology* 152: 3075-3090.
- Dunman PM, Murphy E, Haney S, Palacios D, Tucker-Kellogg G, et al. (2001) Transcription profiling-based identification of *Staphylococcus aureus* genes regulated by the *agr* and/or *sarA* loci. *J Bacteriol* 183: 7341-7353.
- Nagarajan V, Smeltzer MS, Elasri MO (2009) Genome-scale transcriptional profiling in *Staphylococcus aureus* : bringing order out of chaos. *FEMS Microbiol Lett*.
- Liang X, Zheng L, Landwehr C, Lunsford D, Holmes D, et al. (2005) Global regulation of gene expression by ArlRS, a two-component signal transduction regulatory system of *Staphylococcus aureus*. *J Bacteriol* 187: 5486-5492.
- Rogasch K, Ruhmling V, Pane-Farre J, Hoper D, Weinberg C, et al. (2006) Influence of the two-component system SaeRS on global gene expression in two different *Staphylococcus aureus* strains. *J Bacteriol* 188: 7742-7758.
- Said-Salim B, Dunman PM, McAleese FM, Macapagal D, Murphy E, et al. (2003) Global regulation of *Staphylococcus aureus* genes by Rot. *J Bacteriol* 185: 610-619.
- Luong TT, Dunman PM, Murphy E, Projan SJ, Lee CY (2006) Transcription Profiling of the *mgrA* Regulon in *Staphylococcus aureus*. *J Bacteriol* 188: 1899-1910.
- Dubrac S, Boneca IG, Poupel O, Msadek T (2007) New insights into the WalK/WalR (YycG/YycF) essential signal transduction pathway reveal a major role in controlling cell wall metabolism and biofilm formation in *Staphylococcus aureus*. *J Bacteriol* 189: 8257-8269.
