# Supplementary material for: The Pleiotropic CymR Regulator of Staphylococcus aureus Plays an Important Role in Virulence and Stress Response
Source: PubMed Central journal article supplement (PMC2869319; doi:10.1371/journal.ppat.1000894), 2010-05-13
Supplement: ppat.1000894.s007.pdf [file ppat.1000894.s007.pdf]

**Table S5.** Oligonucleotides used in this study

| <b>Name</b> | <b>Description</b>                  | <b>Sequence (5'-3')</b>        |
|-------------|-------------------------------------|--------------------------------|
| OS66        | 5' 16SrRNA (qRT-PCR reference gene) | ACGTGGATAACCTACCTATAAGACTGGGAT |
| OS67        | 3' 16SrRNA                          | TACCTTACCAACTAGCTAATGCAGCG     |
| OS102       | 5'- <i>ahpF</i> (qRT-PCR)           | AGGTTAGTGGTTCGTGCACCT          |
| OS103       | 3'- <i>ahpF</i>                     | GCTTGAACGACATCAGGACA           |
| OS104       | 5'- <i>copA</i> (qRT-PCR)           | CGGTGTAAATGATGCACCTG           |
| OS105       | 3'- <i>copA</i>                     | ATCAAGTCGCCACCAAGAAT           |
| OS106       | 5'- <i>dps</i> (qRT-PCR)            | TGTTAAAGAAGCTGCGAAAGG          |
| OS107       | 3'- <i>dps</i>                      | AGCAATTTTCGATTGCGTTTT          |
| OS108       | 5'- <i>sodA</i> (qRT-PCR)           | GCGGTGGACATTTAAACCAT           |
| OS109       | 3'- <i>sodA</i>                     | CAGCTGCTTTGTGACGAAAT           |
| OS114       | 5'- <i>trxB</i> (qRT-PCR)           | AACCATTAACAGCGCCATTT           |
| OS115       | 3'- <i>trxB</i>                     | AACCTTTGTGCGGAACATCT           |
| OS116       | 5'- <i>trxA</i> (qRT-PCR)           | TAGATTTTTGGGCAACATGG           |
| OS117       | 3'- <i>trxA</i>                     | AGCTGCAGTTGATGGATTTTC          |
| OS118       | 5'- <i>sodM</i> (qRT-PCR)           | CGCAACAGTTGAAGGAACAG           |
| OS119       | 3'- <i>sodM</i>                     | CACCGCCATTATTACGGACT           |
| OS122       | 5'- <i>fur</i> (qRT-PCR)            | GATAAAGCGCCTGAAATTGG           |
| OS123       | 3'- <i>fur</i>                      | TGTTTTGCGCCTTCTTTTCT           |
| OS128       | 5'- <i>perR</i> (qRT-PCR)           | AATTGCATCATTGCGACAAG           |
| OS129       | 3'- <i>perR</i>                     | TTTCATCAGCTGTTGGATGAGT         |
| OS144       | 5'- <i>copA</i> (gel-shift, 316 bp) | CCTAAGAATTGCAAATCCAGAAGT       |
| OS145       | 3'- <i>copA</i>                     | CAGTTTCTTTTCGATACGATTTGA       |
| OS146       | 5'- <i>perR</i> (gel-shift, 346 bp) | TTTGAAAATGAACCTTTGAAACCT       |
| OS147       | 3'- <i>perR</i>                     | GCAATGATGCAATTGATTCTTCTA       |
| OS148       | 5'- <i>fur</i> (gel-shift, 324 bp)  | TATGTATGGTTCACCAGTTTTTTG       |
| OS149       | 3'- <i>fur</i>                      | CGATGTCCACTCCCCTACTAATAA       |
| OS150       | 5'- <i>ahpC</i> (gel-shift, 331 bp) | AAGGTTGACTTAGTTGAGAATACAAAT    |
| OS151       | 3'- <i>ahpC</i>                     | CGCTGTAAATGGTAAGATTTCTTTG      |
| OS152       | 5'- <i>sodA</i> (gel-shift, 347 bp) | AAGTTTATGGTGTATGTGAGTCTTGC     |
| OS153       | 3'- <i>sodA</i>                     | CAAATGCGTATGGTAATTTTGGTA       |
| OS154       | 5'- <i>dps</i> (gel-shift, 352 bp)  | ATGTGGAAAACAACATGGCACCA        |
| OS155       | 3'- <i>dps</i>                      | GTAAGCTACTGTCCAGTTTGCTA        |
| OS85        | 5'- <i>tcyP</i> (gel-shift, 293 bp) | CCTGCTTCATTTTCAAATATTAAT       |
| OS86        | 3'- <i>tcyP</i>                     | GCAATATTACGATGAAAATCACCA       |
